# Supplementary material for: Characteristics of Serum Lipid Metabolism among Women Complicated with Hypertensive Disorders in Pregnancy: A Retrospective Cohort Study in Mainland China
Source: Obstet Gynecol Int. 2024 Feb 14;2024:9070748. doi: 10.1155/2024/9070748 (PMC10881237; doi:10.1155/2024/9070748)
Supplement: Supplementary Materials — Table S1: validity and deletion number of serum lipid concentrations among women with PE, GH, and CH. Table S2: comparison between maternal serum lipids concentrations of 4–16 weeks and 28–42 weeks of pregnancy in different types of HDP. Table S3: mean of maternal serum lipid concentrations between mild and severe preeclampsia. . [file 9070748.f1.zip]

Archive with 3 entries (3 files):
- Table S1 (1).docx
- Table S2 (1).docx
- Table S3 (1).docx
